# Supplementary material for: Arginine-rich peptides as crystallization inhibitors for sodium urate
Source: Royal Society of Chemistry journal article supplement (doi:10.1039/d3tb00666b), 2023-01-01
Supplement: d3tb00666b1.pdf [file d3tb00666b1.pdf]

## **Supporting information**

### **Arginine-rich peptides as crystallization-inhibitor for sodium urate**

Yan Liu,\* QianYa Zhang, JiaMei Du, Rong Guo\*

School of Chemistry and Chemical Engineering, Yangzhou University, Yangzhou,  
225002, P. R. China.

\* Email: [yanliu@yzu.edu.cn](mailto:yanliu@yzu.edu.cn), [guorong@yzu.edu.cn](mailto:guorong@yzu.edu.cn), Phone/fax: +86-514-87971802.

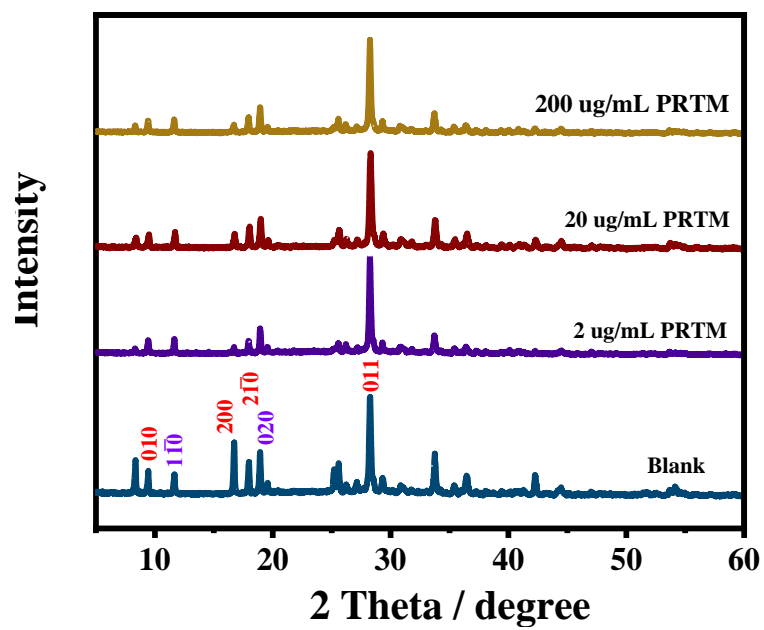

Fig. S1. XRD patterns of urate crystals obtained in the presence of PRTM with different concentrations after crystallization for 24 h . [Uric acid] = 8 mM, [NaCl] = 150 mM, pH 7.4, 37 °C.

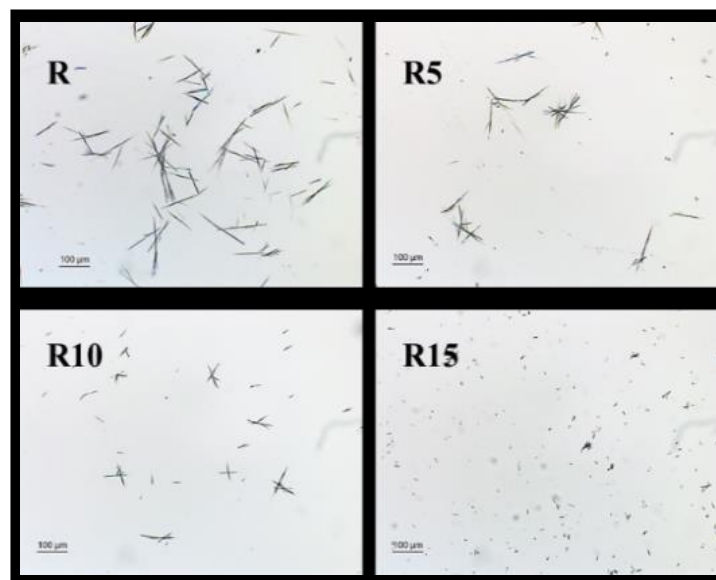

Fig. S2. The optical micrograph of urate crystal obtained in the presence of Arg and peptides after crystallization for 24 h. [Uric acid] = 8 mM, [NaCl] = 150 mM, pH 7.4, 37 °C.

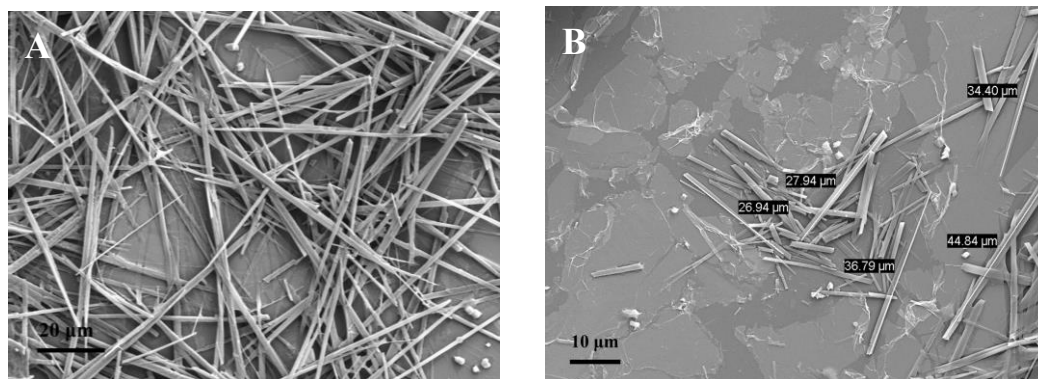

Figure S3. The SEM images of urate crystal obtained in the presence of Arg (A) and R<sub>10</sub> (B) after crystallization for 24 h . [Uric acid] = 8 mM, [NaCl] = 150 mM, pH 7.4, 37 °C.

Table S1. The chemical composition of MSUM samples obtained with and without PRTM for C, N and H.

| Sample                     | C (%)            | N (%)            | H (%)           |
|----------------------------|------------------|------------------|-----------------|
| MSUM obtained without PRTM | $28.82 \pm 0.01$ | $26.94 \pm 0.01$ | $2.55 \pm 0.03$ |
| MSUM obtained with PRTM    | $28.89 \pm 0.03$ | $26.86 \pm 0.00$ | $2.66 \pm 0.03$ |
| Theoretical                | 28.85            | 26.92            | 2.40            |
